# Supplementary material for: Unmasking the biological function and regulatory mechanism of NOC2L: a novel inhibitor of histone acetyltransferase
Source: PubMed Central journal article supplement (PMC9844006; doi:10.1186/s12967-023-03877-2), 2023-01-17

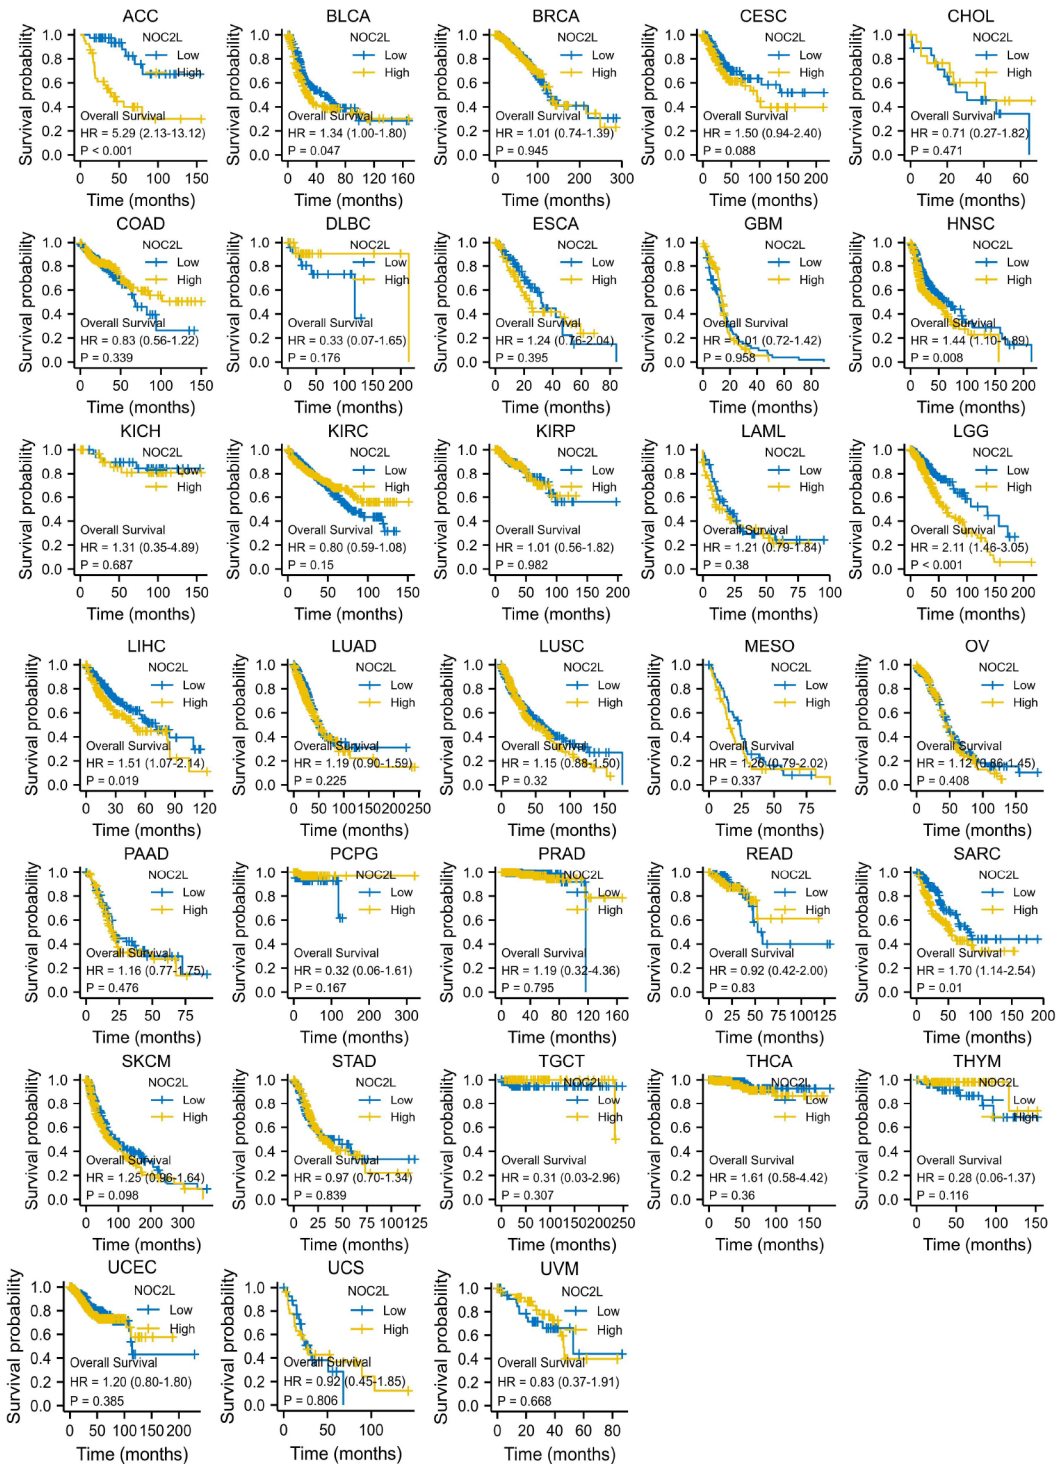

Supplement: 12967_2023_3877_MOESM2_ESM.pdf [file 12967_2023_3877_MOESM2_ESM.pdf]
